# Supplementary material for: Extended X-ray absorption fine structure (EXAFS) characterisation of dilute palladium homogeneous catalystsElectronic supplementary information (ESI) available: electronic supplementary data (ESI) available: data includes reaction profile for and structural/statistical data from EXAFS analysis of Pd(OAc)2/PBut3 catalysed Heck reaction. See http://www.rsc.org/suppdata/cc/b3/b307535d/
Source: Royal Society of Chemistry journal article supplement (doi:10.1039/b307535d), 2003-01-01
Supplement: b307535d.doc [file b307535d.doc]

Supplementary information.

Supplementary Table 1 shows co-ordination, bond length, and statistical data derived from analysis (in EXCURVE 98) of the EXAFS spectra shown in figure 2 and for other points during the catalytic reaction. The reaction was conducted *ex situ* and was injected into a sample cell. All measurements were conducted at standard room temperature and pressure

Supplementary figure 1 shows the reaction profile for the Heck reaction, using 4-bromoacetophenone and butyl acrylate as reactants and Pd(OAc)2/PtBu3 (Pd/P = 1:3) as catalyst. Tributylamine was used as the base and NMP was used as the reaction solvent. Di(ethylene glycol) dibutyl ether was used as the internal GC standard and the reaction was repeated 3 times and an average value taken for each point.

The blue line represents the consumption of 4-bromoacetophenone, and the red line represents the yield of product. Zero time on the X-scale represents time=0 for temperature at 393K, time = -20 and -10 represent Temperature = 293K and 353K respectively. In the article, EXAFS spectra (a),(b) and (c) in Figure 2 represent points A,B and C on the above figure.
